# Supplementary material
Source: Royal Society of Chemistry journal article supplement (doi:10.1039/d6ta01843b)
Supplement: d6ta01843b1.pdf [file d6ta01843b1.pdf]

“Remediation of Perfluorooctane Sulfonic Acid (PFOS) using Supported Lipid Bilayers on Mesoporous-SiO<sub>2</sub>”

<sup>1</sup>Tutun das Aka, <sup>1</sup>Tomas Boller, <sup>1</sup>Graham Dobereiner and <sup>1\*</sup>Stephanie L. Wunder

<sup>1</sup>Department of Chemistry, Temple University, Philadelphia, PA

\*Corresponding author, Email: slwunder@temple.edu

Supplementary Information

| Table of Contents                                                                                                                                                                                                                                                                                                                                                           |      |
|-----------------------------------------------------------------------------------------------------------------------------------------------------------------------------------------------------------------------------------------------------------------------------------------------------------------------------------------------------------------------------|------|
|                                                                                                                                                                                                                                                                                                                                                                             | Page |
| Preparation of Liposomes                                                                                                                                                                                                                                                                                                                                                    | 3    |
| Dynamic Light Scattering (DLS) Data                                                                                                                                                                                                                                                                                                                                         | 4, 5 |
| <b>Figure S1.</b> DLS data for neat unilamellar liposomes and unilamellar liposomes incubated with PFOS in DPPC/PFOS ratios of 25/1, 1/1 and 0.5/1, as a function of time for 90 minutes                                                                                                                                                                                    | 4    |
| <b>Table S1.</b> Dynamic Light Scattering (DLS) data for neat LUVs and LUVs incubated with PFOS                                                                                                                                                                                                                                                                             | 5    |
| Effects of temperature, pH, ionic strength and natural organic matter (NOM)                                                                                                                                                                                                                                                                                                 | 5    |
| TGA Data                                                                                                                                                                                                                                                                                                                                                                    | 6-14 |
| <b>Figure S2.</b> TGA of Syloid®3150 mesoporous SiO <sub>2</sub> before and after soaking in water to measure pore volume.                                                                                                                                                                                                                                                  | 6    |
| <b>Figure S3.</b> TGA and derivative TGA (DTGA) data of neat DPPC, neat PFOS, pristine Syloid®3150 mesoporous SiO <sub>2</sub> and Syloid®3150 after immersion in 100 mM NaCl and 20 mM CaCl <sub>2</sub> . Temperature range 25 °C to 800 °C.                                                                                                                              | 7    |
| <b>Figure S4.</b> TGA and DTGA data of Syloid®3150 mesoporous SiO <sub>2</sub> after soaking in DPPC/(CHCl <sub>3</sub> /MeOH) and evaporation of the (CHCl <sub>3</sub> /MeOH) so that there would be nominal 122%, 97.5%, 76.3% and 49% coverage. Comparison of nominal and experimental coverage obtained by TGA.                                                        | 8    |
| <b>Figure S5.</b> TGA data of Syloid®3150 mesoporous SiO <sub>2</sub> after removal of (CHCl <sub>3</sub> /MeOH), soaking in aqueous (100 mM NaCl and 20 mM CaCl <sub>2</sub> ) solutions, and undergoing 5-10 freeze/thaw cycles. The mesoporous SiO <sub>2</sub> was allowed to settle, and the supernate removed. The remaining thick liquid was dried and TGA obtained. | 9    |
| <b>Figure S6.</b> TGA and DTGA data of Syloid®3150 mesoporous SiO <sub>2</sub> from dried aqueous Syloid®3150 mesoporous-SiO <sub>2</sub> , incubated with PFOS and particles dried.                                                                                                                                                                                        | 10   |
| <b>Figure S7.</b> TGA of Syloid®3150 mesoporous SiO <sub>2</sub> ( <b>Figure S3</b> ): (A) after addition of DPPC lipid in CHCl <sub>3</sub> and evaporation of CHCl <sub>3</sub> ; (B) after hydration of the DPPC lipid with 100 mM NaCl + 20 mM CaCl <sub>2</sub> to form SLBs and evaporation of water; (C) after exposure to PFOS in 0.1 mM NaCl and removal of water. | 11   |
| <b>Figure S8.</b> TGA data: (A) of pristine humic acid; (B) for same Syloid®3150 mesoporous SiO <sub>2</sub> in <b>Figure S3</b> after exposure to humic acid, rinsed 3x with water and vacuum dried; (C) for SLBs ( <b>Figure S7B</b> ) after exposure (15 min) to HA.                                                                                                     | 12   |
| <b>Figure S9.</b> TGA data of (A) SLBs exposed to HA solution ( <b>Figure S8C</b> ) after rinsing 3x with water and vacuum drying; (B) SLBs with PFOS ( <b>Figure S7C</b> ) exposed to HA solution after                                                                                                                                                                    | 13   |

|                                                                                                                                                                                                                                                                                                                                                             |       |
|-------------------------------------------------------------------------------------------------------------------------------------------------------------------------------------------------------------------------------------------------------------------------------------------------------------------------------------------------------------|-------|
| vacuum removal of water; (C) same as (Figure S9B) after rinsing 3x with water and vacuum removal of water.                                                                                                                                                                                                                                                  |       |
| <b>Figure S10.</b> (A) TGA data for larger sample of SLBs (from batch of Figure S7C) that was incubated with PFOS; and (B) after sample in (A) was immersed in boiling water for 1 h and vacuum dried.                                                                                                                                                      | 14    |
| <b><sup>19</sup>F-NMR data</b>                                                                                                                                                                                                                                                                                                                              | 15    |
| <b>Figure S11.</b> <sup>19</sup> F NMR of pristine PFOS and supernatant after incubation with SLBs at T = 7 °C, RT, 50 °C and 90 °C. Areas of the -CF <sub>3</sub> resonance at -81 ppm for neat PFOS and after incubation at different temperatures are tabulated                                                                                          | 15    |
| <b>Figure S12.</b> <sup>19</sup> F NMR of pristine PFOS at T = 25 °C, 0.1 mM NaCl at different pH values, and supernatant after incubation with SLBs at T = 25 °C, 0.1 mM NaCl as a function of pH. Areas of the -CF <sub>3</sub> resonance at -81 ppm for neat PFOS and after incubation at different pH values are tabulated.                             | 16    |
| <b>Figure S13.</b> <sup>19</sup> F NMR of pristine PFOS at T = 25 °C, pH 7 and at different ionic strengths, and the supernatant after incubation with SLBs at T = 25 °C, pH = 7, as a function of ionic strength. Areas of the -CF <sub>3</sub> resonance at -81 ppm for neat PFOS and after incubation at different ionic strengths values are tabulated. | 17    |
| <b>Figure S14.</b> <sup>19</sup> F-NMR data of a Syloid®3150 mesoporous SiO <sub>2</sub> -SLB with nominal 51% coverage (~ 35% actual) hydrated with 100 mM NaCl and 20 mM CaCl <sub>2</sub> incubated with PFOS, as a function of time, compared with the pristine PFOS solution                                                                           | 18    |
| <b>Figure S15.</b> Control study. <sup>19</sup> F-NMR data of a pristine Syloid®3150 mesoporous SiO <sub>2</sub> (15.4 mg) incubated in 2.5 mL 1.02 mg/mL PFOS for 1 h and centrifuged (15 min). Supernatant (750uL PFOS solution+ 80 uL D <sub>2</sub> O) compared with (750uL PFOS solution+ 80 uL D <sub>2</sub> O) of original PFOS solution.           | 18    |
| <b>LC-TQOF-MS</b>                                                                                                                                                                                                                                                                                                                                           | 19    |
| <b>Figure 16.</b> LC-TQOF-MS data showing that PFOS is removed in less than 10 minutes.                                                                                                                                                                                                                                                                     | 19    |
| Calculations                                                                                                                                                                                                                                                                                                                                                | 20-21 |

### Preparation of liposomes

Multilamellar and unilamellar liposomes were made by dissolution of neat DPPC or mixtures of DPPC and PFOS in methanol/chloroform (MeOH/CHCl<sub>3</sub> = 1/2 v/v). Lipid concentrations were kept at ~ 1 mg/mL unless otherwise noted. The multilamellar liposomes were prepared by evaporation of the MeOH/CHCl<sub>3</sub> and hydrated with 0.1M NaCl. The hydrated liposomes were heated above their order-to-disorder temperature,  $T_m$ , and immersed in dry ice/acetone for ~ six freeze-thaw cycles. Unilamellar liposomes were prepared by extrusion of the multilamellar liposomes with 100 nm polycarbonate filters above  $T_m$ . Ratios of DPPC/PFOS = 75/1, 50/1, 25/1, 15/1, 10/1, 5/1, 2.5/1, 1/1 and 0.5 were prepared. For incubated multilamellar liposomes/unilamellar liposomes, the DPPC/PFOS ratio indicates the molar ratio of DPPC to PFOS in the solutions, while for the prepared multilamellar liposomes/unilamellar liposomes it is the ratio incorporated into the lipid films before hydration. For the incubation studies, the PFOS concentrations used were well below the critical micelle concentration (CMC)<sup>22</sup>, reported as ~ 5.5–7.4 mM for LiPFOS<sup>23</sup> and 0.02 mol/kg for NaPFOS<sup>24</sup> at 25 °C.

### Dynamic Light Scattering (DLS) Data

DLS data for neat unilamellar liposomes and unilamellar liposomes incubated with PFOS in DPPC/PFOS ratios of 25/1, 1/1 and 0.5/1, as a function of time for 90 minutes show that liposomes remain intact.

A table (**Table S1**) of liposome diameters from DLS data indicates that even the 1/1 remains stable for 3 days. After heating above  $T_m$  and cooling, some liposome fusion does occur.

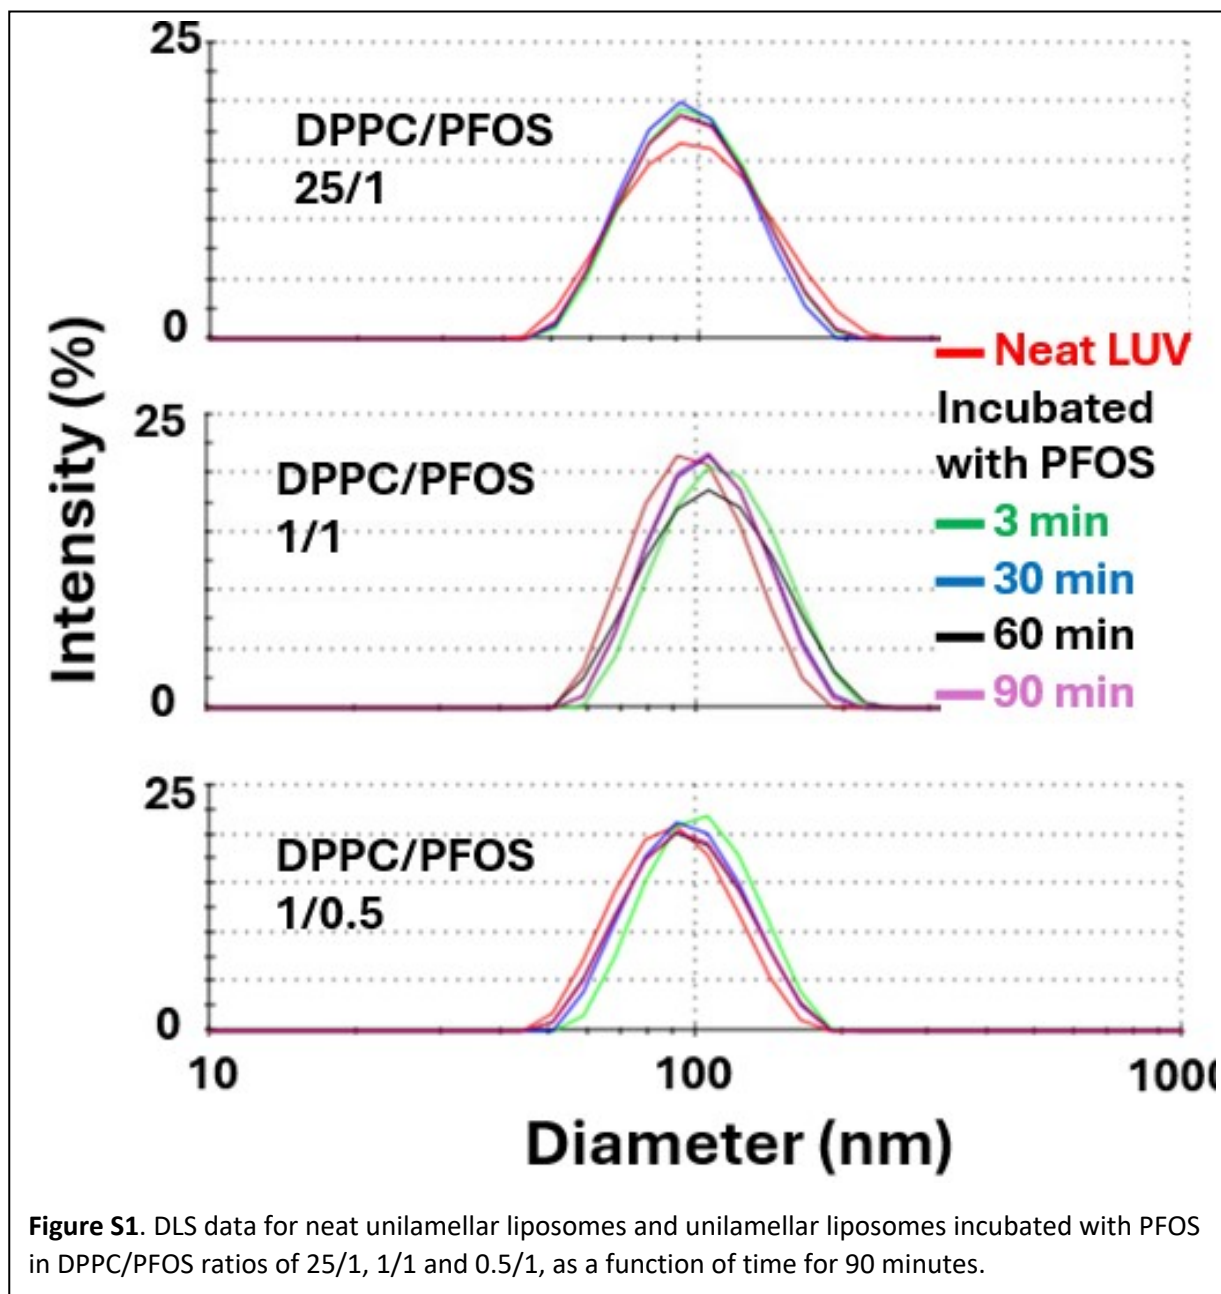

**Figure S1.** DLS data for neat unilamellar liposomes and unilamellar liposomes incubated with PFOS in DPPC/PFOS ratios of 25/1, 1/1 and 0.5/1, as a function of time for 90 minutes.

| <b>Table S1.</b> Dynamic Light Scattering (DLS) data for neat LUVs and LUVs incubated with PFOS |                  |                 |                      |                            |
|-------------------------------------------------------------------------------------------------|------------------|-----------------|----------------------|----------------------------|
| DPPC/PFOS                                                                                       | Temperature (°C) | Time            | Size (Diameter) (nm) | Polydispersity Index (PDI) |
| 100/0                                                                                           | 25               | 0 min           | 110.8                | 0.139                      |
|                                                                                                 | 50               | 15 min          | 114.8                | 0.060                      |
|                                                                                                 | 70               | 1 h             | 121.0                | 0.058                      |
|                                                                                                 | 25               | 10 min          | 106.4                | 0.093                      |
| 7.5/1                                                                                           | 25               | 0 min (no PFOS) | 97.14                | 0.059                      |
|                                                                                                 | 25               | 3 min           | 103.6                | 0.042                      |
|                                                                                                 | 25               | 1.5 h           | 103.9                | 0.046                      |
|                                                                                                 | 50               | 15 min          | 116.8                | 0.056                      |
| 2.5/1                                                                                           | 25               | 0 min (no PFOS) | 103.2                | 0.037                      |
|                                                                                                 | 25               | 3 min           | 108.8                | 0.022                      |
|                                                                                                 | 50               | 1 h             | 116.4                | 0.058                      |
|                                                                                                 | 25               | 10 min          | 106.1                | 0.123                      |
| 1/1                                                                                             | 25               | 0 min (no PFOS) | 104.9                | 0.058                      |
|                                                                                                 | 25               | 3 min           | 113.4                | 0.060                      |
|                                                                                                 | 25               | 3 days          | 113.8                | 0.035                      |
|                                                                                                 | 50               | 1 h             | 169.4                | 0.237                      |
|                                                                                                 | 25               | 10 min          | 186.6                | 0.197                      |

### Effects of temperature, pH, ionic strength and natural organic matter

Another batch of Syloid®3150 mesoporous SiO<sub>2</sub> was prepared and characterized by TGA for the amount of lipid in the SLBs (**Figure S3**). The same vials containing the SLBs and sorbent solutions were used for both the TGA and <sup>19</sup>F NMR experiments. The actual amounts of SLBs and solutions in the vials were adjusted so that there was always 1.02 mg/mL for 10 mg SLBs. Then 750 µL of the supernatant (containing 0.765 mg PFOS) was removed and 65 µL of D<sub>2</sub>O was added. Thus, what we measured by <sup>19</sup>F NMR was the amount remaining in the supernatant from a solution that originally contained 0.765 mg PFOS. The SLBs were then analyzed by TGA.

The addition of HA to either pristine mesoporous SiO<sub>2</sub> or SLBs on mesoporous SiO<sub>2</sub> did not result in further weight gain (**Figure S4**).

### Stability of the SLBs

The removal of the lipids from the SLBs was only possible at the initial stage of lipid addition, when the lipids had been added using MeOH/CHCl<sub>3</sub>. After the hydration process with 100 mM NaCl + 20 mM CaCl<sub>2</sub>, it was not possible to remove the SLBs using boiling water for 1 h (**Figure S5**).

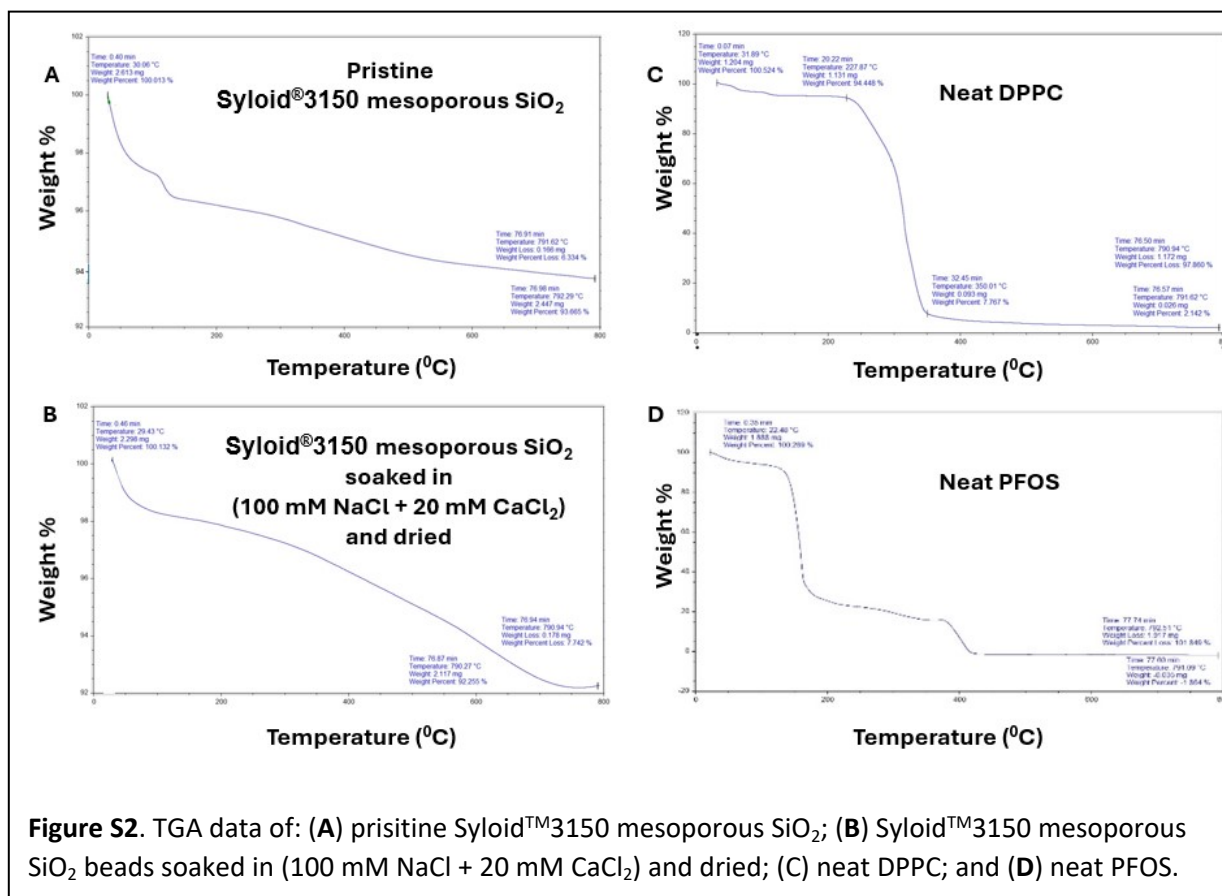

**Figure S2.** TGA data of: (A) pristine Syloid<sup>™</sup>3150 mesoporous SiO<sub>2</sub>; (B) Syloid<sup>™</sup>3150 mesoporous SiO<sub>2</sub> beads soaked in (100 mM NaCl + 20 mM CaCl<sub>2</sub>) and dried; (C) neat DPPC; and (D) neat PFOS.

**TGA Data**

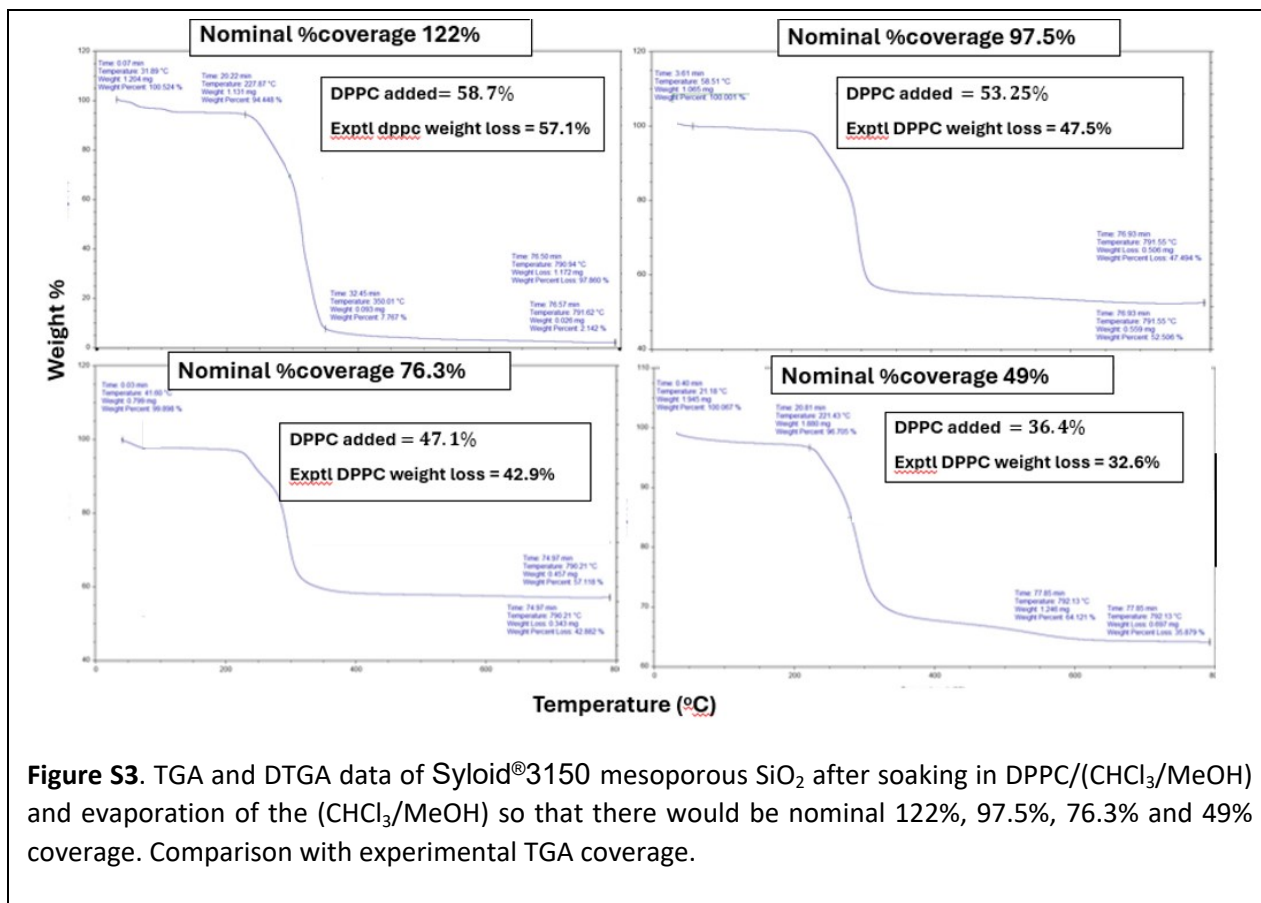

**Figure S3.** TGA and DTGA data of Syloid®3150 mesoporous SiO<sub>2</sub> after soaking in DPPC/(CHCl<sub>3</sub>/MeOH) and evaporation of the (CHCl<sub>3</sub>/MeOH) so that there would be nominal 122%, 97.5%, 76.3% and 49% coverage. Comparison with experimental TGA coverage.

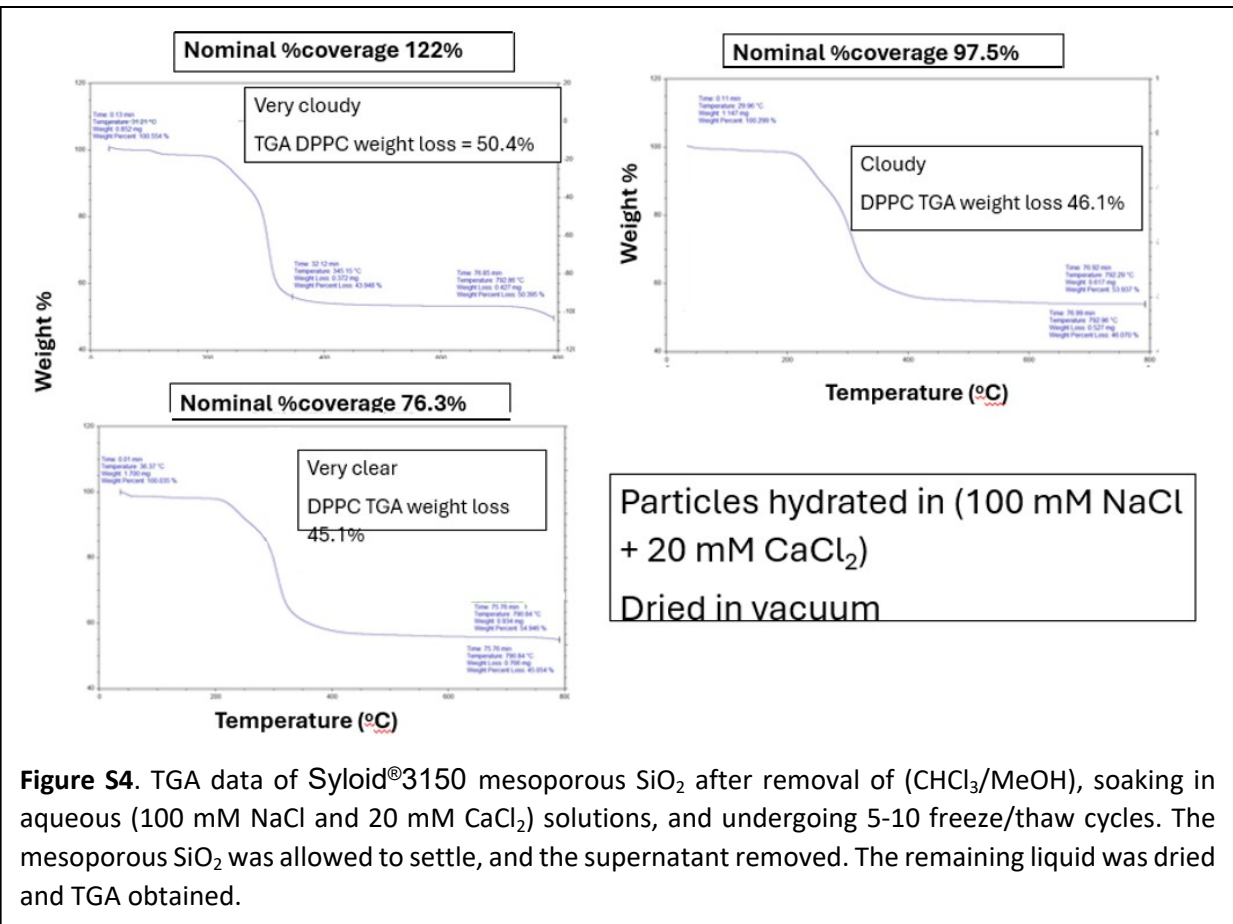

**Figure S4.** TGA data of Syloid®3150 mesoporous SiO<sub>2</sub> after removal of (CHCl<sub>3</sub>/MeOH), soaking in aqueous (100 mM NaCl and 20 mM CaCl<sub>2</sub>) solutions, and undergoing 5-10 freeze/thaw cycles. The mesoporous SiO<sub>2</sub> was allowed to settle, and the supernatant removed. The remaining liquid was dried and TGA obtained.

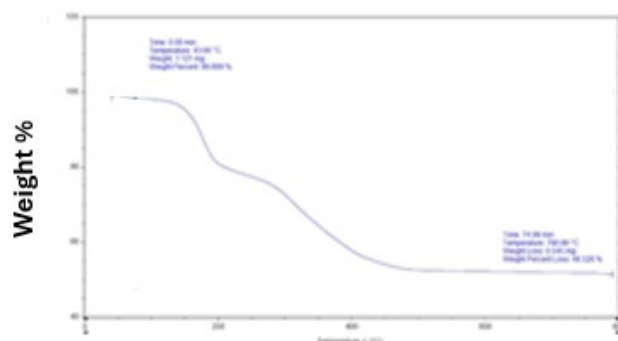

Temperature (°C)

**Nominal 122% DPPC coverage**

In new vial  
 SLB= 11.9 mg  
 PFOS= 2.04 mg (1.2 ml)  
 Shake with PFOS 1h, centrifuge,  
 remove supernatant and extra  
 solution before TGA.

48.5% DPPC/PFOS

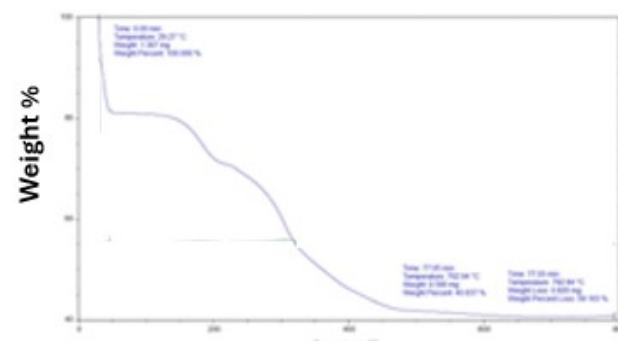

Temperature (°C)

**Nominal 97.5% DPPC coverage**

In new vial  
 SLB= 9.3 mg  
 PFOS= 2.04 mg (1 ml)  
 Shake with PFOS for 1 h, centrifuge,  
 remove supernatant and extra  
 water before TGA.

59.1% DPPC/PFOS

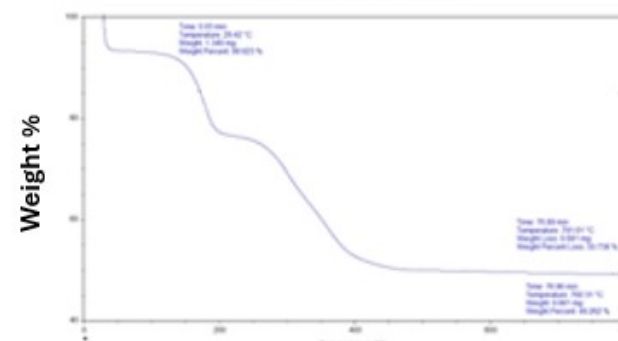

Temperature (°C)

**Nominal 76% DPPC coverage**

In new vial  
 SLB= 7.5 mg  
 PFOS= 2.04 mg (1 ml)  
 Shake with PFOS 1h, centrifuge,  
 remove supernatant and extra  
 water before TGA; weight loss

50.7% DPPC/PFOS

**Figure S5.** TGA data of Syloid®3150 mesoporous SiO<sub>2</sub> from dried aqueous Syloid®3150 mesoporous-SiO<sub>2</sub>, incubated with PFOS and particles dried.

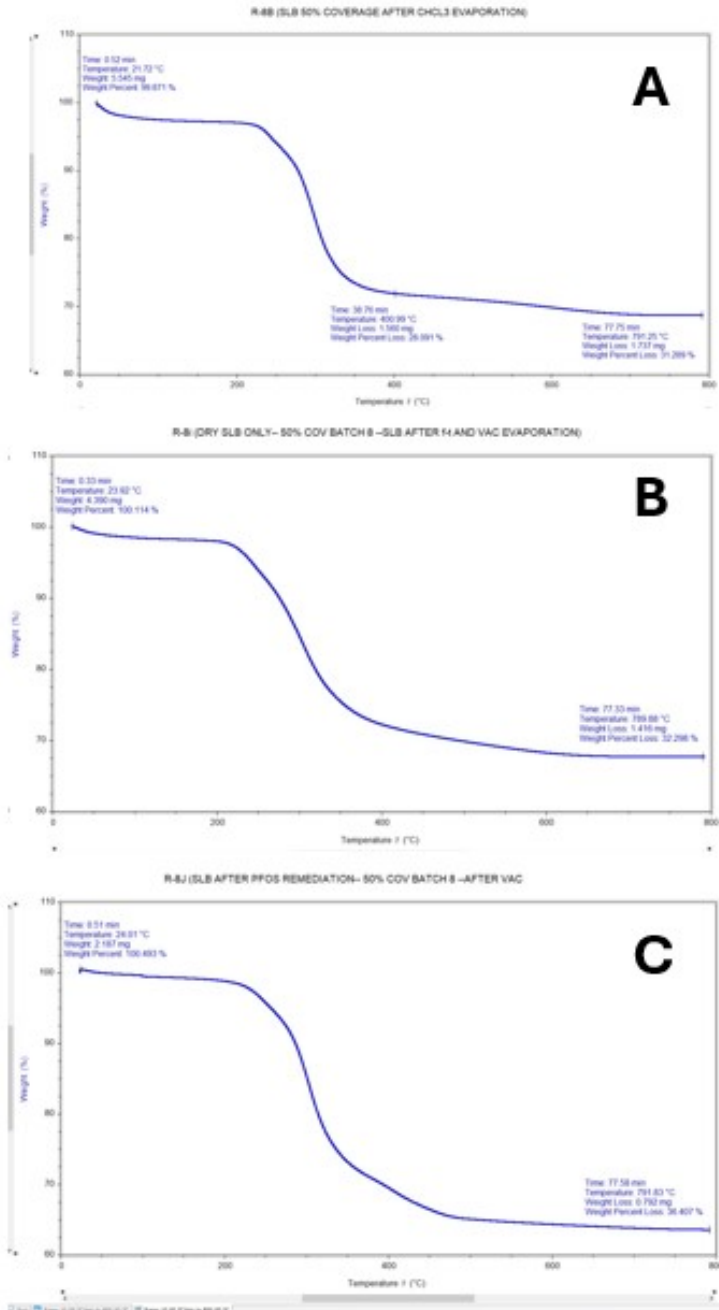

Total weight loss: 31.3%-2.3%  
(free water)= 29%

Lipid leaves ~ 2% at 800 °C and  
silanol condensation removes  
~ 2.5%

Therefore ~ 28.5% lipid

Total weight loss: 32.3-  
2%(water loss) + 2% (residual  
lipid) -2.5% (bound  
water/silanol condensation)-  
1% salt

Lipid: 28.8 %

Total weight loss: 36.4%

Assuming SiOH condensation  
same

⇒ 6.1% PFOS

**Figure S6.** TGA of Syloid®3150 mesoporous SiO<sub>2</sub>: (A) after addition of DPPC lipid in CHCl<sub>3</sub> and evaporation of CHCl<sub>3</sub>; (B) after hydration of the DPPC lipid with 100 mM NaCl + 20 mM CaCl<sub>2</sub> to form SLBs and evaporation of water; (C) after exposure to PFOS in 0.1 mM NaCl and removal of water.

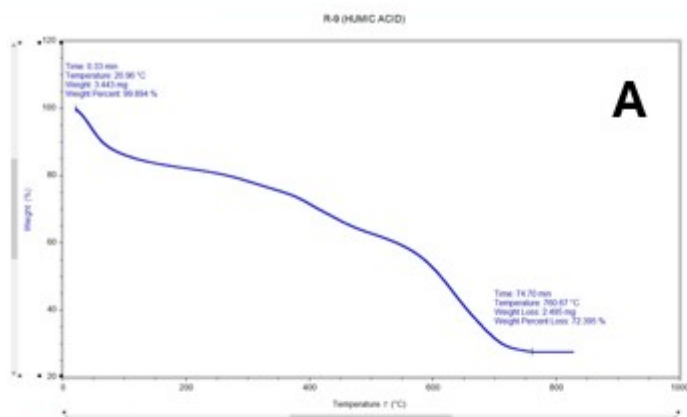

Total weight loss = 72.4

Water: 15%

HA = 57.4%

27.6% remaining HA

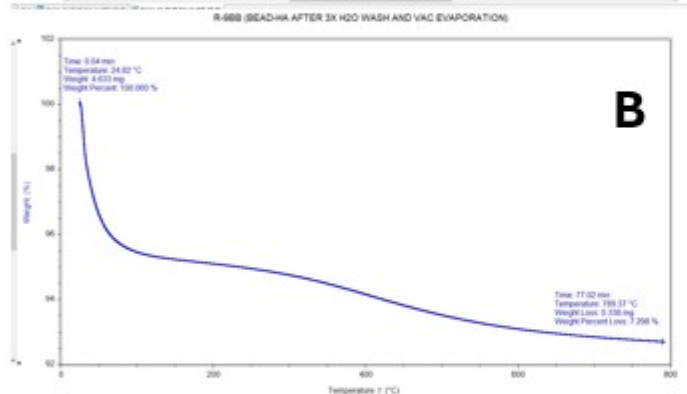

Water: 5%

Silanol condensation:

2.3%

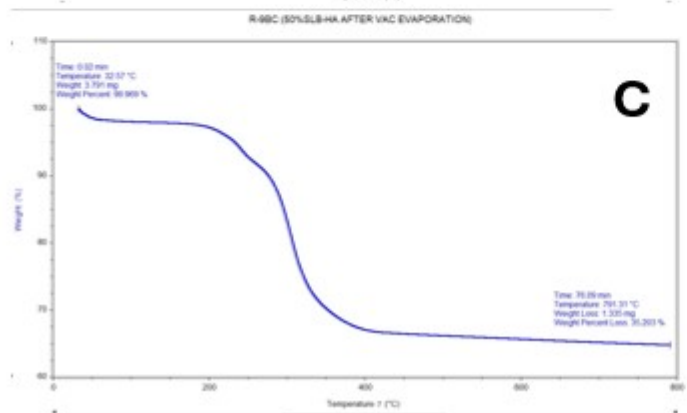

Total weight loss: 35.2%

Water: 98%

Lipid: 33.2%

Silanol condensation:

2.3%

**Figure S7.** TGA data of: (A) pristine humic acid; (B) Syloid®3150 mesoporous SiO<sub>2</sub> after exposure to humic acid, rinsed 3x with water and vacuum dried; and (C) SLBs with 33% lipid after exposure (15 min) to HA.

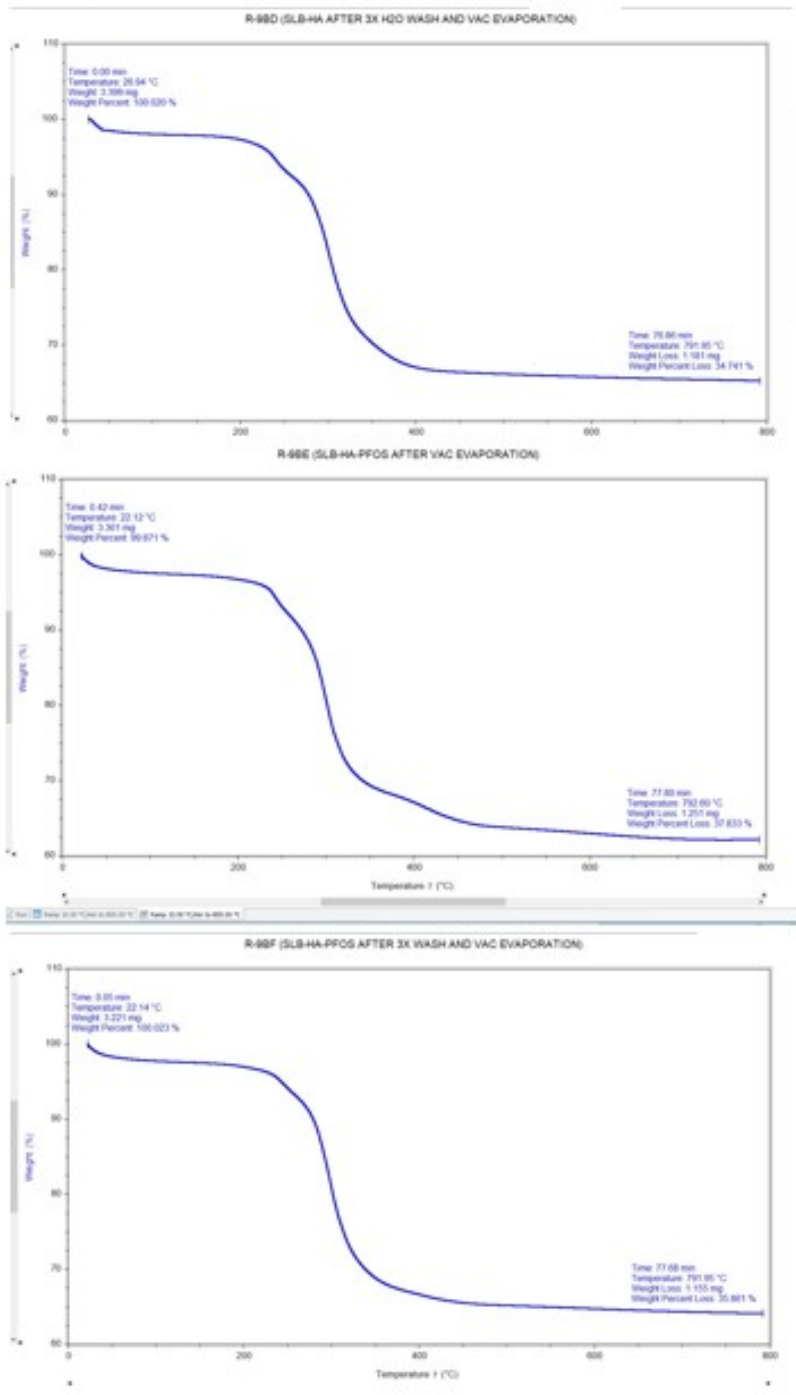

Total weight loss: 34.7%  
 Lipid: 32.7%  
 Water: 2%

Total weight loss: 37.8  
 Water: 2%  
 Lipid + PFOS = 35.8%

Total weight loss:  
 35.86%  
 Water: 2%  
 Lipid + PFOS = 33.86%

**Figure S8.** TGA data of (A) SLBs exposed to HA solution after rinsing 3x with water and vacuum drying; (B) SLBs with PFOS exposed to HA solution after vacuum removal of water; (C) same as (Figure S9B after rinsing 3x with water and vacuum removal of water.

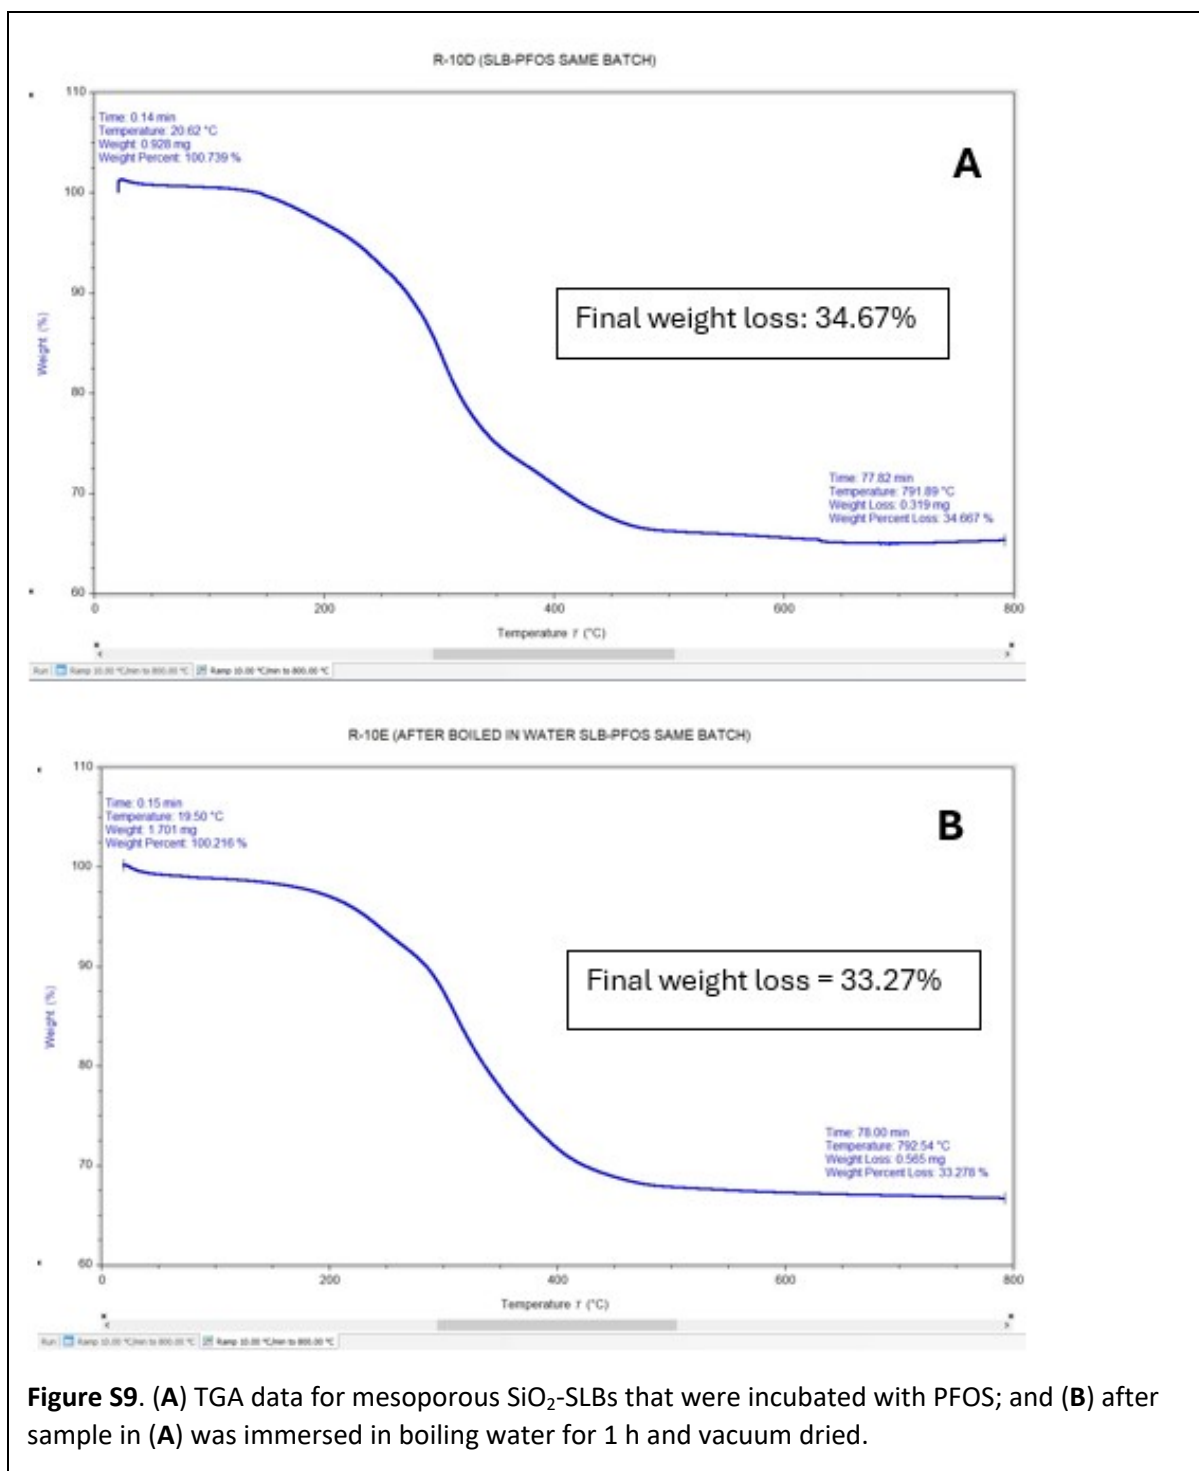

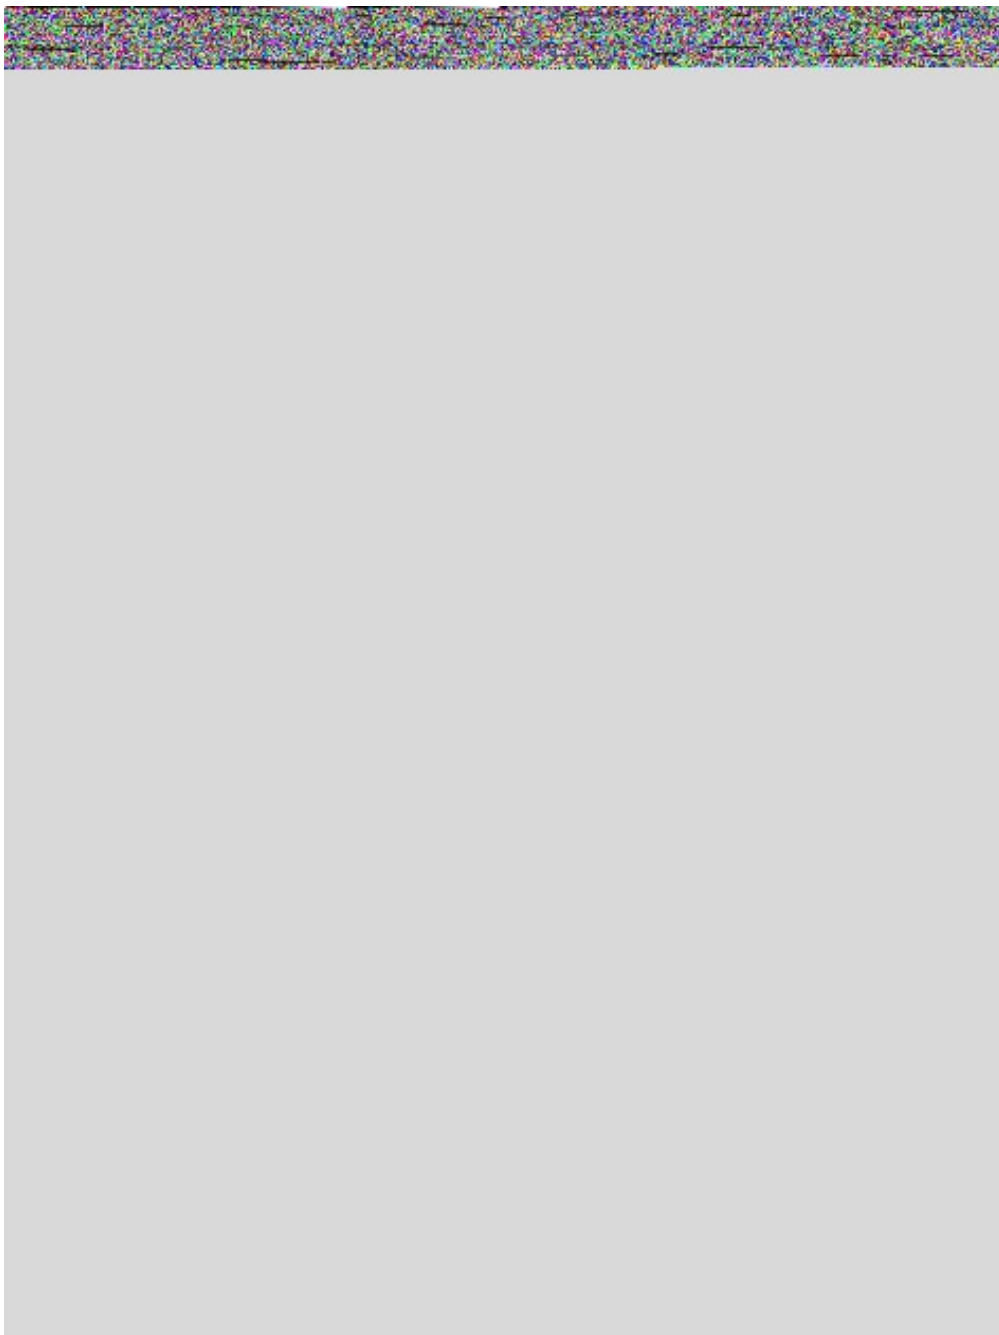

**Figure S10.** (A) TGA data for larger sample of SLBs (from batch of **Figure S7C**) that was incubated with PFOS; and (B) after sample in (A) was immersed in boiling water for 1 h and vacuum dried.

## <sup>19</sup>F NMR Data

### <sup>19</sup>F NMR Data for the effects of temperature, pH, ionic strength and natural organic matter

For analysis of the NMR data, 65  $\mu$ L of D<sub>2</sub>O was added to 750  $\mu$ L of the supernatant (containing 0.765 mg PFOS) taken from vials containing approximately 10 mg (9.66 $\pm$ 0.4) of the SLBs that were incubated for 15 min with  $\sim$ 1 mL of an aqueous solution. The solution contained 1.02 mg PFOS (1.02 mg/mL PFOS) and NaCl (different molarities) and pH. The actual amounts of SLBs and solution were adjusted so that there was always 1.02 mg/mL for 10 mg SLBs. The <sup>19</sup>F NMR signal from -CF<sub>3</sub> was compared with that of the original solution containing 0.765 mg PFOS.

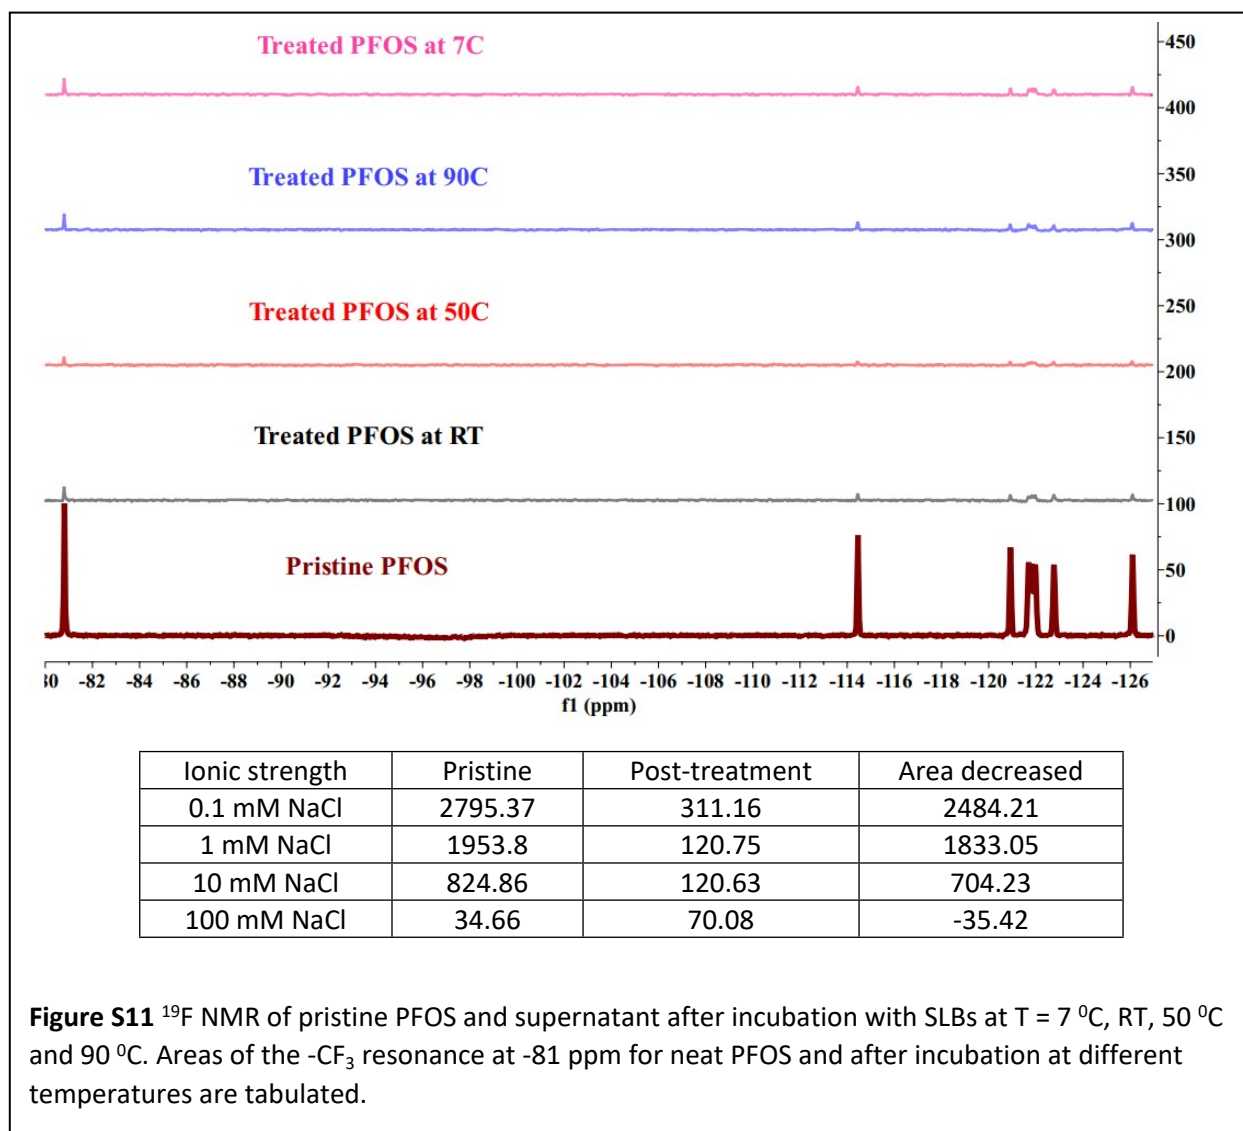

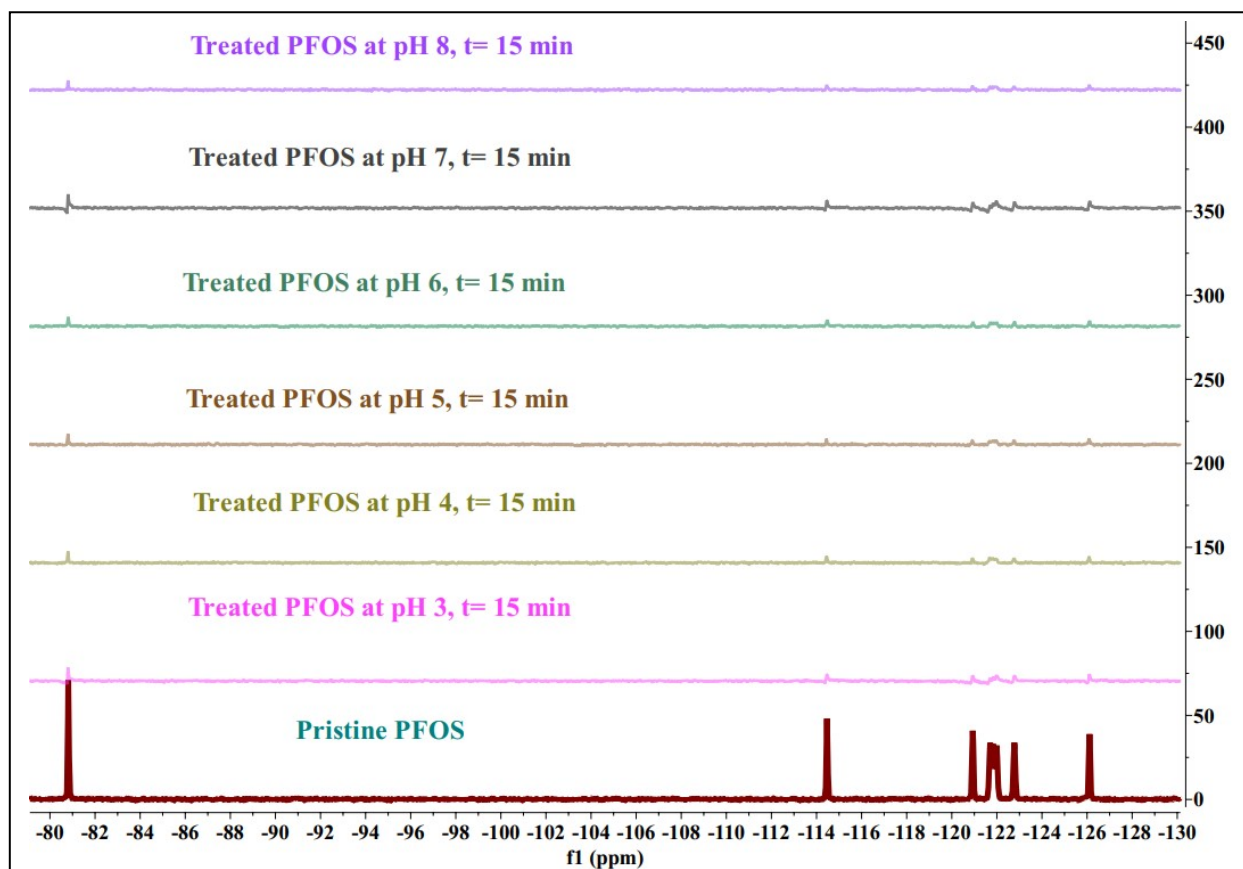

| pH | Pristine | Post-treatment | Area decreased |
|----|----------|----------------|----------------|
| 3  | 2218.97  | 318.35         | 1900.62        |
| 4  | 2496.68  | 206.84         | 2289.84        |
| 5  | 2319.68  | 206.65         | 2113.03        |
| 6  | 2427.54  | 211.09         | 2216.45        |
| 7  | 2795.37  | 311.16         | 2484.21        |
| 8  | 2557.57  | 155.56         | 2402.01        |

**Figure S12.**  $^{19}\text{F}$  NMR of pristine PFOS at  $T = 25\text{ }^{\circ}\text{C}$ , 0.1 mM NaCl at different pH values, and supernatant after incubation with SLBs at  $T = 25\text{ }^{\circ}\text{C}$ , 0.1 mM NaCl as a function of pH. Areas of the  $-\text{CF}_3$  resonance at -81 ppm for neat PFOS and after incubation at different pH values are tabulated.

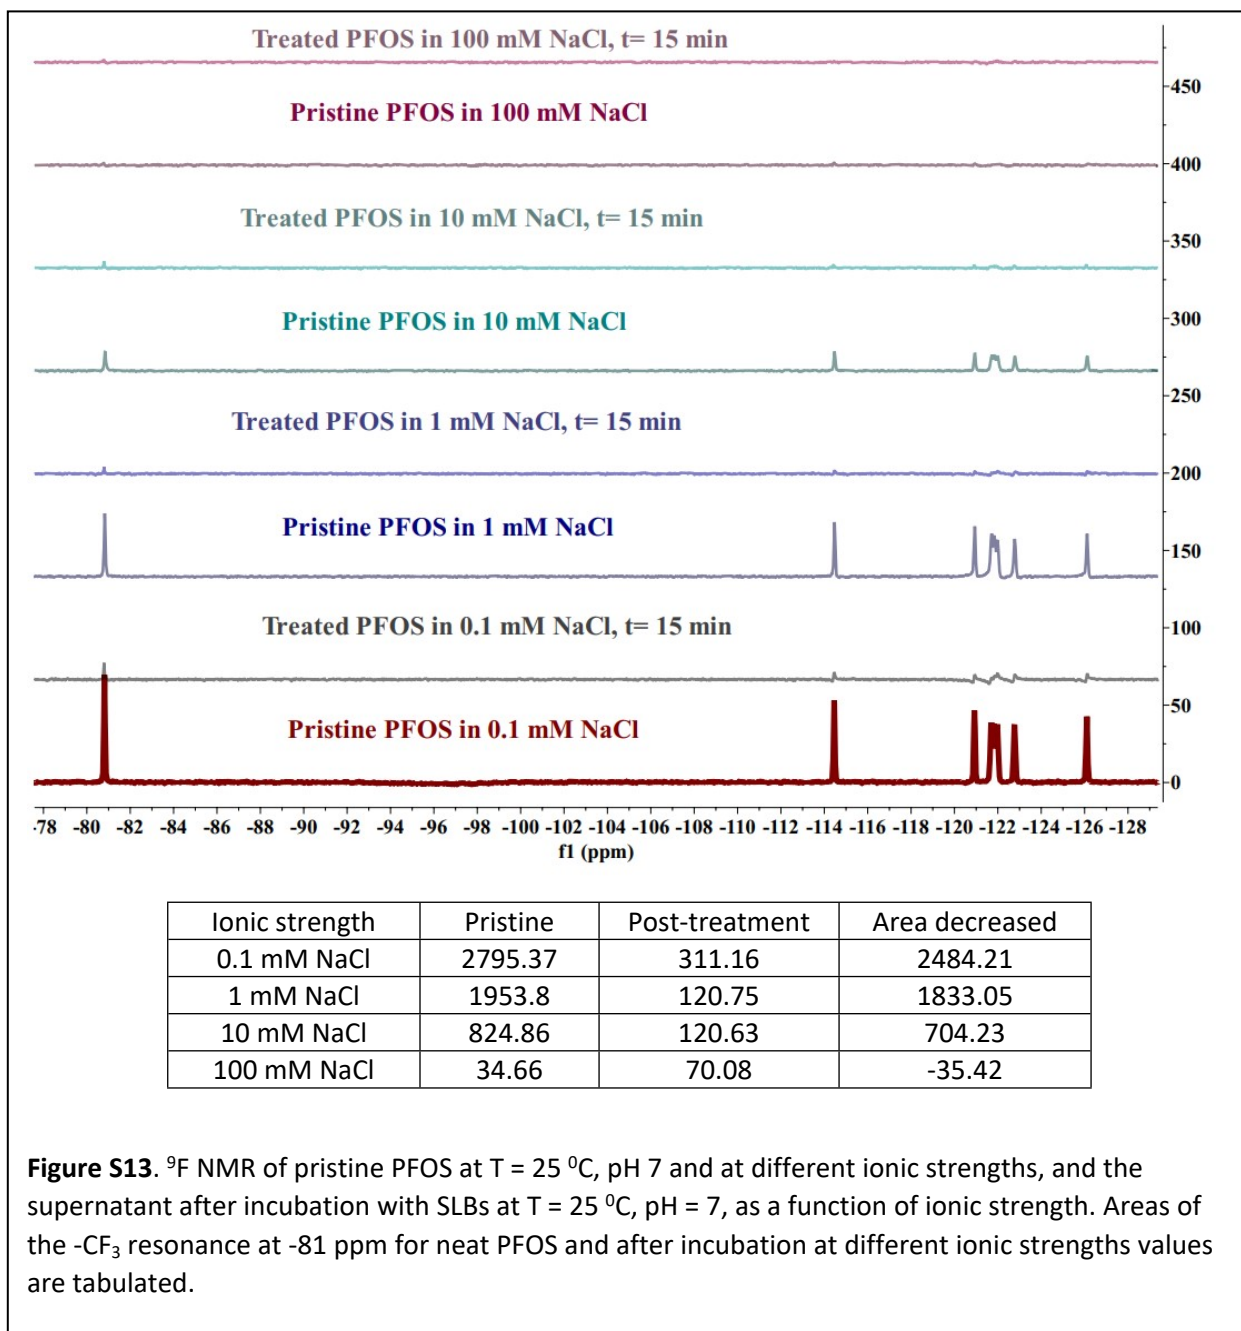

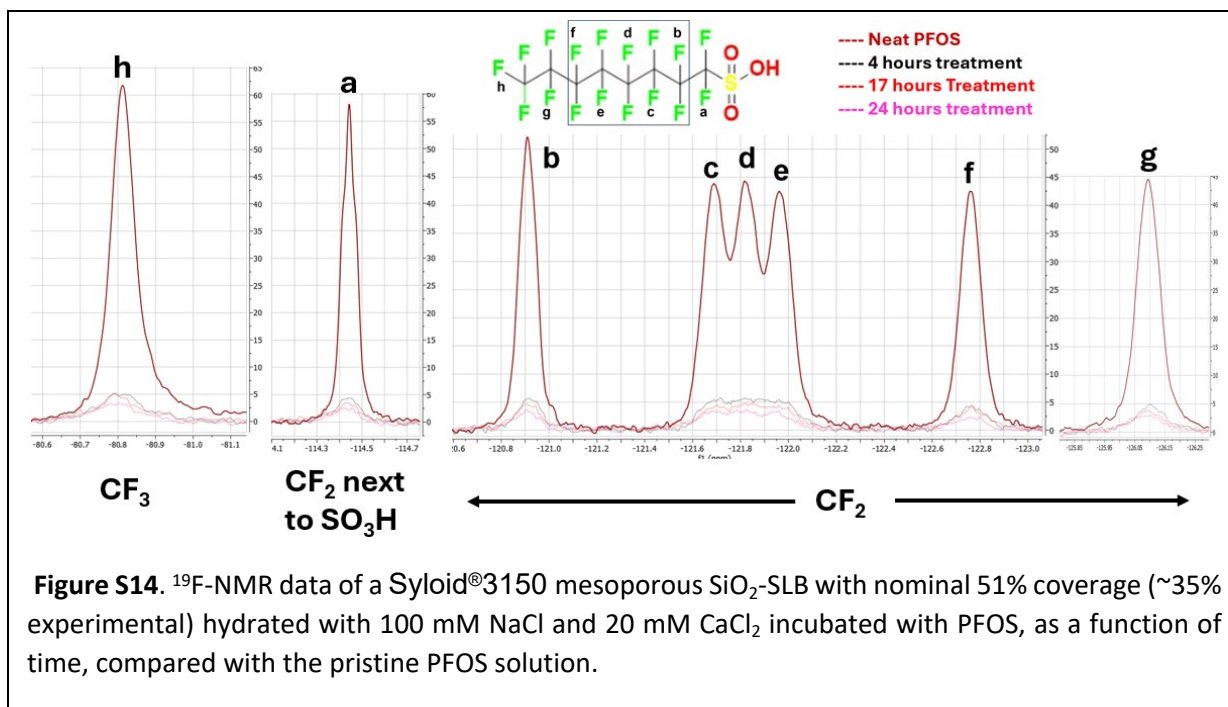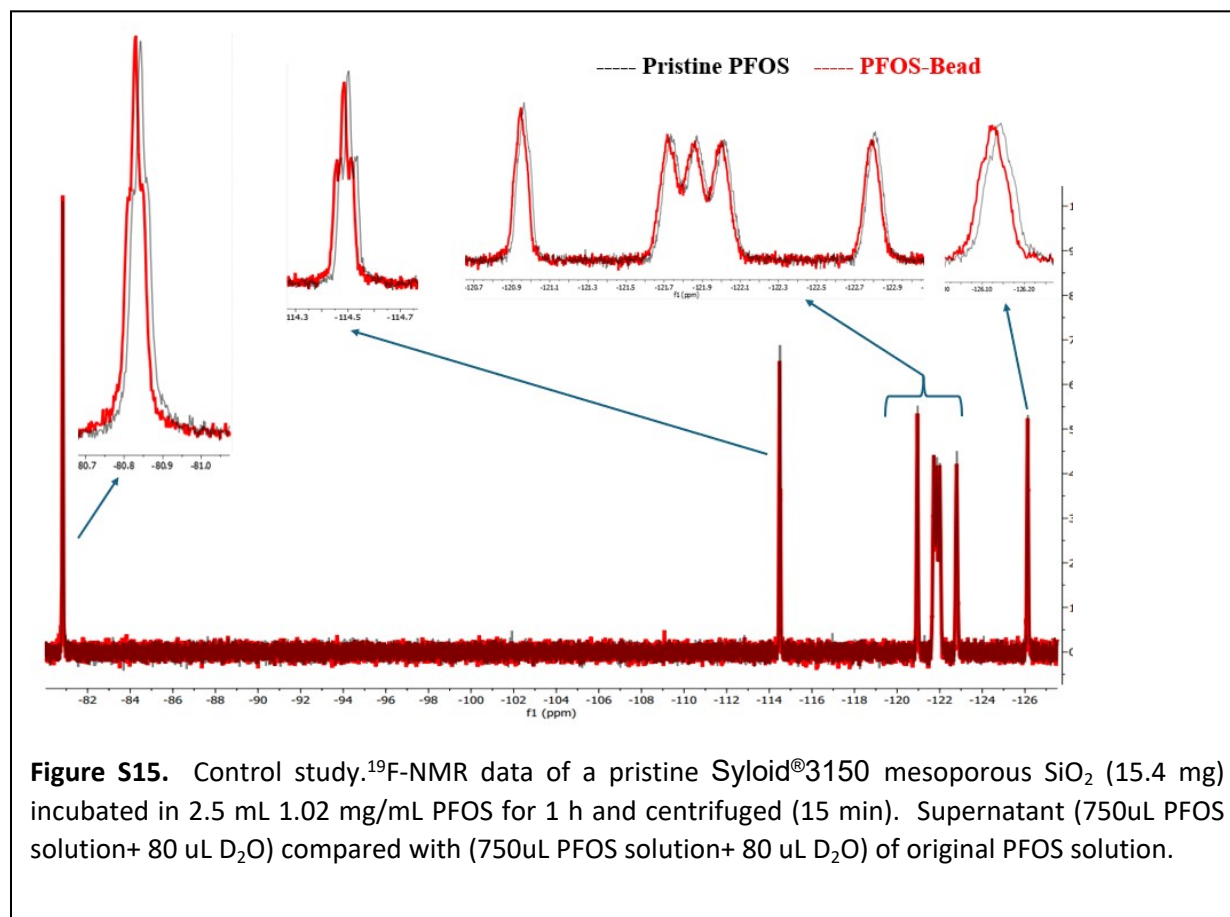

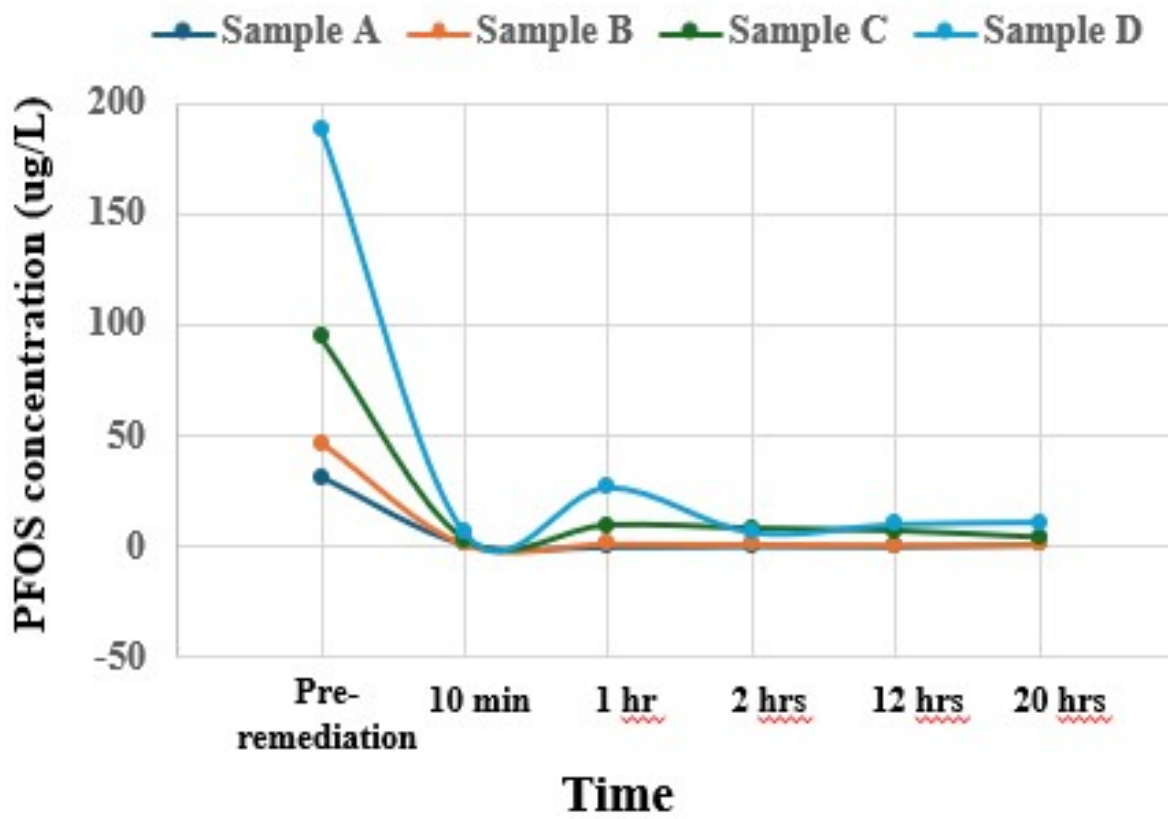

Figure S16. LC-TQOF-MS data on ug/L PFOS solutions as a function of time, showing PFOS removed < 10 min

## Calculations

### Lipid Coverage in the pores of the mesoporous SiO<sub>2</sub>

When the mesoporous SiO<sub>2</sub> beads are immersed in CHCl<sub>3</sub> solutions of lipids, all the lipid may not be incorporated into the pore interior since:

1. Not all the pores may be accessible (e.g. too small)
2. Lipid films can also form on the exterior of the beads, and form MLVs during the hydration step.

To ensure that sorption capacities were measured for mesoporous SiO<sub>2</sub> beads when there were *SLBs only in the pores*, the solutions that were clear (nominal 76.3% and 49%) were used for capacity measurements. However, sorption capacities were also calculated for nominal coverages (122%, and 97.5%) after MLVs were removed from the solution, by removing the mesoporous SiO<sub>2</sub> and placing it in a new aqueous solution; in the latter case the capacities reflected PFOS removal from both the SLBs and the MLVs. However, since the capacities are similar to the nominal 76.3% and 49% solutions, it is likely that most of the MLVs were removed.

1. **Nominal Coverage:** The weight of lipids necessary to form SLBs/weight beads, assuming all the pores are accessible.
2. Lipid solutions above and below this calculated amount were prepared.
3. Known weights of mesoporous SiO<sub>2</sub> beads were immersed in the lipid solutions.
4. After removing the CHCl<sub>3</sub>, the mesoporous SiO<sub>2</sub> beads were immersed in water and salt solutions and were freeze dried to form SLBs (expected in the pores) or MLVs (expected from lipids forming films on the exterior of the particles).
5. **Experimental Coverage:** Experimental lipid coverage for solutions after removal of CHCl<sub>3</sub> and water (with 100 mM NaCl + 20 mM CaCl<sub>2</sub>) were measured by TGA.
6. **Sorption Capacity:**
  - a. When MLVs were formed, the solutions were cloudy.
  - b. The SLBs were removed from the cloudy solutions and rinsed.
  - c. Sorption capacities were measured for the solutions not originally cloudy and for the rinsed beads (that could still contain some MLVs).

**Nominal (100%) coverage: assume all pores accessible, i.e. use specific surface area (SSA) provided by manufacturer**

Calculation of lipid to form a single SLB in all the pores, assuming all pores accessible, i.e. 100% lipid coverage (nominal coverage):

1. Need nominal specific surface area (SSA)- given by manufacturer. For Syloid®3150, SSA=
$$\frac{320m^2SiO_2}{g SiO_2}$$
2. Assume area/DPPC is  $\frac{0.67nm^2}{lipid}$  and 2 lipids/bilayer
3. Calculate # DPPC molecules needed to form 100% coverage and convert SiO<sub>2</sub> and DPPC to weights:

$$\text{For 100\% coverage: } \frac{wt (mgDPPC)}{wt (x mgSiO_2)} = 1.168$$

4. Compare the calculated (nominal) 100% coverage to actual (experimental) coverage measured by TGA to obtain Experimental % coverage.

#### Experimental Coverages

$$\text{Experimental \% coverage} = \frac{\frac{\% DPPC \text{ measured by TGA}}{\% SiO_2 \text{ measured by TGA}}}{1.168} \times 100$$

Nominal and Experimental DPPC coverages of mesoporous SiO<sub>2</sub> beads and their capacities presented in **Table 2**.
